# Supplementary material
Source: publisher figshare collection journal article supplement (https://acs.figshare.com/ndownloader/files/21922626)
Supplement: Supplementary file 1 [file 21922626]

## Sheet: Supplemetary_table_SX2
Supplementary Table S5. Estimation of real protein FDR using UPS+E.coli data set.
		DirectMS1					IdentiPy+Scavager
filename	#proteins	#non-UPS human proteins	fraction, %	real FDR, %		#proteins	#non-UPS human proteins	fraction, %	real FDR, %
20130510_EXQ1_IgPa_QC_UPS1_01	368	4	1.08696	1.32547		1779	30	1.68634	2.05638
20130510_EXQ1_IgPa_QC_UPS1_04	630	10	1.5873	1.93561		2021	42	2.07818	2.5342
20130510_EXQ1_IgPa_QC_UPS1_02	528	7	1.32576	1.61667		1969	42	2.13306	2.60113
20130510_EXQ1_IgPa_QC_UPS1_03	427	7	1.63934	1.99907		1712	26	1.51869	1.85194
		in average:	1.40984	1.7192			in average:	1.85407	2.26091
number of human proteins in database:	20193
number of E.coli proteins in database:	4431
total number of proteins	24624
coefficient:	1.21943
